# Supplementary material for: Combining rails and anchors with laser forcing for selective manipulation within 2D droplet arrays
Source: Royal Society of Chemistry journal article supplement (doi:10.1039/c1lc20541b), 2011-01-01
Supplement: c1lc20541b.pdf [file c1lc20541b.pdf]

# Combining rails and anchors with laser forcing for selective manipulation within 2D droplet arrays - Supplementary movie captions

Etienne Fradet<sup>1</sup>, Craig McDougall<sup>2</sup>, Paul Abbyad<sup>1,3</sup>, Rémi Dangla<sup>1</sup>,  
David McGloin<sup>2</sup> and Charles N. Baroud<sup>1 \*</sup>

June 21, 2011

<sup>1</sup>Laboratoire d'Hydrodynamique (LadHyX) and Department of Mechanics, Ecole Polytechnique, CNRS, 91128 Palaiseau, France.

<sup>2</sup>Electronic Engineering and Physics Division, University of Dundee, Nethergate, Dundee, DD1 4HN UK.

<sup>3</sup>Laboratoire d'Optique et Biosciences (LOB), Ecole Polytechnique, INSERM U696, CNRS, 91128 Palaiseau, France.

**Movie S1 - Selectively extracting drops.** An array of holes with a diameter of 50  $\mu\text{m}$  is initially filled with water drops with a radius of 200  $\mu\text{m}$ . A laser with a power of 200 mW is focused on the water-oil interface, pushing the drops one-by-one out of the anchor sites. An X is patterned with the remaining droplets. The movie is in real time.

**Movie S2 - Selectively filling an array.** Droplets are derailed from their default path onto a storage rail using a laser. The movie shows the complete filling of the first line and the first three droplets of the five remaining lines. The movie is in real time.

**Movie S3 - Filling an array with two droplet populations.** Water droplets with a radius of 100  $\mu\text{m}$  and containing *KSCN* are first flushed in a test section patterned with two rows of anchors of 200  $\mu\text{m}$  in

---

\*email: baroud@ladhyx.polytechnique.fr

diameter. The oil flow rate is then increased to leave one drop per trap. Water droplets containing  $FeCl_3$  are finally brought at low flow rates, from a second inlet, and fill the gaps in the array. The movie is in real time.

**Movie S4 - Laser induced merging of droplets in anchor sites.** Each hole traps two droplets which contain different chemical reagents,  $KSCN$  and  $FeCl_3$  respectively. The laser is placed on the interface between two drops to trigger their fusion. A chemical reaction inducing a red color then takes place. The laser completes its path leaving five anchor points with a reaction product and all other droplets undisturbed forming a W pattern. The movie is in real time.
